1

2

3

4 Vertical transmission of Zika virus in orally-infected *Aedes aegypti* produces  
5 infectious adult progeny.

6

7

8

9

10

11 Genevieve Comeau<sup>1</sup>, Robert A. Zinna<sup>1</sup>, Taylor Scott<sup>1</sup>, Kacey Ernst<sup>2</sup>, Kathleen Walker<sup>1</sup>, Yves

12 Carrière<sup>1</sup>, Michael A. Riehle<sup>1\*</sup>

13

14 <sup>1</sup>Department of Entomology, University of Arizona, Tucson, AZ 85721

15 <sup>2</sup>Epidemiology and Biostatistics Department, Mel and Enid Zuckerman College of Public Health,

16 University of Arizona, Tucson, AZ 85724

17

18 \*Corresponding author

19 [mriehle@ag.arizona.edu](mailto:mriehle@ag.arizona.edu) (MR)

20

## 21 **Abstract**

22 Vertical transmission, or pathogen transfer from mother to offspring, can facilitate  
23 persistence of emerging arboviruses, such as Zika virus (ZIKV), in mosquito populations.  
24 Understanding vertical transmission and the different environmental and temporal conditions that  
25 affect it is important to assess whether new outbreaks could occur without reintroduction of the  
26 virus. To determine the rate of vertical transmission for ZIKV, *Aedes aegypti* females were fed  
27 on ZIKV infected blood, maintained under three temperature conditions (27°C, 30°C, and 33°C),  
28 and allowed to oviposit three times. Progeny were tested for virus presence at 3, 7, and 14 days  
29 after adult emergence. The overall vertical transmission rate was 6.5% (3.9 - 9.9). Vertical  
30 transmission was observed across all maternal temperature conditions and was detected in adult  
31 progeny as young as 3 days and as late as 14 days post-emergence. In total, 3.4% (1.6 - 6.2) of  
32 adult progeny produced saliva with detectable ZIKV, indicating their capacity to transmit ZIKV  
33 to humans. To our knowledge, this is the first evidence that vertical transmission occurs from  
34 orally-infected female *Aedes aegypti* to their adult progeny at a range of temperatures, and proof  
35 that Zika virus can persist in the saliva of those progeny throughout their lifetimes. These results  
36 suggest that the virus may be maintained in *Ae. aegypti* populations without a vertebrate host,  
37 allowing for human infections to occur without consistent re-introductions of ZIKV.

38

## 39 **Author Summary**

40 In 2015, Zika virus spread to over 50 countries. However, it is not known whether the  
41 virus persisted in the outbreak areas or became locally extinct. One way mosquito-borne viruses,

42 like Zika, could become established is by transferring directly between mosquito generations  
43 rather than circulating between mosquitoes and humans. This is known as vertical transmission,  
44 and happens when the virus infects the developing eggs of infected maternal mosquitoes. As  
45 with other mosquito-borne diseases, like dengue, in order to infect humans the virus must be  
46 present in the saliva of infected mosquito progeny during blood feeding. We found vertical  
47 transmission occurred throughout the infected mother's reproductive lifetime and across a range  
48 of temperature conditions. Vertically infected progeny had Zika virus in their saliva as early as  
49 three days after adult emergence, implying that they could infect a person even during their first  
50 bloodmeal. Importantly, this work indicates that Zika virus could establish itself in the mosquito  
51 population even when human to mosquito transmission is not actively occurring.

52

## 53 **Introduction**

54 Zika virus (ZIKV) is a mosquito-borne flavivirus that emerged as a significant human  
55 pathogen in French Polynesia and has since spread to over 50 countries. (1) While asymptomatic  
56 in approximately 80% of cases, ZIKV infection can cause adverse pregnancy outcomes, such as  
57 Zika congenital syndrome (2), and serious neural complications in children and adults including  
58 Guillain-Barre and fatal encephalitis. (3) It is primarily transmitted to humans through the bite of  
59 the yellow fever mosquito *Aedes aegypti*, although other mosquito species are also competent.  
60 (4) Following the pandemic in 2015, 2.2 billion people live in areas that reported active ZIKV  
61 transmission. (5) A better understanding of how ZIKV becomes permanently established after  
62 introduction to these new locales is needed to assess risk and prevent disease.

63 Arthropod-borne viruses, or arboviruses, can become established in a geographic region  
64 through several mechanisms, including 1) regular viral reintroduction and circulation across  
65 geographies, 2) established human or non-human reservoirs, and 3) virus maintenance in the  
66 vector population. (6) Maintenance in the vector population keeps viruses prevalent when there  
67 are few human or other hosts, such as between outbreaks (7). It also helps arboviruses, such as  
68 West Nile, Ross River, and Sindbis, survive cold temperatures and low vector population  
69 numbers during harsh winter months. (8, 9) Vertical transmission, or direct pathogen transfer  
70 from mother to offspring, is one path to arboviral maintenance in vector populations. Vertical  
71 transmission of other *Ae. aegypti*-borne viruses such as dengue, chikungunya, yellow fever, and  
72 West Nile occurs in both the laboratory and field for *Ae. aegypti*. (10-13) Interestingly, vertical  
73 transmission occurs at a higher rate in *Aedes* than other genera of mosquitos. (7) If Zika is also  
74 vertically transmitted, it may increase the risk of becoming established in a given area and  
75 causing future outbreaks without reintroduction.

76 Vertical transmission of ZIKV alone is not sufficient for another outbreak to occur. To  
77 infect a human, virus must be present in the saliva of the vertically-infected progeny. Such  
78 progeny would then bypass the extrinsic incubation period (EIP), which is the time between the  
79 ingestion of a viremic blood meal by a female mosquito and the time when virus is present in the  
80 saliva. Estimates of the EIP of ZIKV range from 4-10 days (14, 15) and this EIP could  
81 potentially limit ZIKV spread due to the limited lifespan of *Ae. aegypti* in the field (16).  
82 Furthermore, vertically infected mosquitoes do not need to obtain an initial ZIKV infected blood  
83 meal, leading to increased infection rates and younger infected mosquitoes. If the saliva of  
84 vertically-infected mosquitoes is infected with ZIKV earlier than horizontally-infected

85 mosquitoes, they would have more opportunities to transmit the virus. However, the capacity of  
86 vertically-infected mosquitos to develop infectious saliva has not been evaluated.

87 Previous studies have implicated ZIKV as vertically transmitted, but evidence is limited  
88 by study conditions and endpoints. One study demonstrated a low rate, (1/290) adults, of vertical  
89 transmission in adult progeny. However, virus was introduced intrathoracically into the maternal  
90 mosquitoes, which bypasses midgut invasion and escape barriers and could impact the rate of  
91 infection. (17) A subsequent study demonstrated higher rates of vertical transmission in  
92 immature mosquitos, 1/84 larvae, but this rate might not accurately reflect infection status  
93 following adult eclosion and does not provide insights into whether ZIKV infected adults have  
94 virus in their saliva. (18) Neither study examined how vertical transmission varies under  
95 different environmental conditions, though factors such as temperature and humidity conditions  
96 can strongly influence arboviral transmission dynamics. (19-22) Gonotrophic cycle, or number  
97 of egg batches laid, and adult mosquito age also affect vertical transmission rates of arboviruses.  
98 (7, 23) To date, no studies have investigated the rate of ZIKV vertical transmission at multiple  
99 temperature conditions, gonotrophic cycles, or whether infection persists during the lifetime of  
100 adult progeny.

101 The objective of this study, therefore, was to quantify the rate of ZIKV vertical  
102 transmission to adult offspring of orally infected female *Ae. aegypti* mothers across multiple  
103 maternal temperatures, gonotrophic cycles, and adult progeny ages. As many countries reported  
104 active ZIKV transmission after the 2015 outbreak, the results of this study will help inform  
105 public health policy, surveillance strategies, and potential interventions.

106

107 **Methods**

108 *Mosquito Rearing*

109 Mosquitoes originated from an established lab colony of UGAL strain *Ae. aegypti*. and were  
110 reared in an ACL2 insectary at 27°C, 75% RH, and 16:8 light:dark photoperiod cycle. Larval  
111 mosquitoes were reared at a density of 100-150 larvae per liter of water and fed ground cat chow.  
112 Pupae were transferred to emergence cages with a density of 50 mosquitoes/cage. Adult  
113 mosquitoes were provided 10% sucrose *ad libitum* via soaked cotton balls. Sucrose soaked  
114 cotton balls were replaced with water soaked cotton balls 24 hours before bloodmeals to  
115 encourage feeding.

116

117 *Cell Culture and Virus Propagation*

118 Vero cells were cultured in DMEM supplemented with 10% FBS and incubated at 37°C and 5%  
119 CO<sub>2</sub>. At 80% confluence, cells were either split 1:5 or infected with ZIKV. During infection old  
120 culture media was removed, then 2 mL of fresh media was mixed with virus (ZIKV strain  
121 PRVABC59, ATCC) and diluted to a multiplicity of infection of 10. After dilution, cells were  
122 incubated for 1 hour at 37°C and 5% CO<sub>2</sub>, rocking the flask every 15 min. After 1 hour, the  
123 infectious media was removed and fresh media added to the flask. After new media was added,  
124 cells were incubated for 96 hours at 37°C and 5% CO<sub>2</sub> until 90% cytopathic effect was attained.  
125 Cell culture media was then pipetted into a 15 mL tube and centrifuged at 300 x g for 10 minutes  
126 (24). Viral supernatant was transferred to a new 15 mL tube, mixed to 20% volume/volume with  
127 fetal calf serum, and stored at -80°C until use.

128

129 *Plaque Assay*

130 Plaque assays were conducted based on protocols provided by VIRAPUR and those developed  
131 by *Agbulos et al* (25) to determine the ZIKV stock viral titer prior to oral infections, with slight  
132 modifications. ZIKV stock titers were also assessed using qPCR (see ZIKV qPCR methods  
133 below). For plaque assays, Vero cells were plated in 6-well plates and incubated overnight.  
134 Media was removed from the cells and viral stock diluted in serum-free DMEM from  $10^{-2}$  to  $10^{-6}$ .  
135 The ZIKV dilutions were allowed to adsorb onto cells for 1 hour, rocking every 15 minutes to  
136 distribute virus among the cells. Following adsorption, infectious media was removed and 3 mL  
137 of DMEM mixed with 4% agarose was overlaid onto the cells. Overlaid Vero cells were  
138 incubated for 5 days at 37°C and 5% CO<sub>2</sub>, then stained with 0.1 volume of 5mg/mL MTT and  
139 incubated for a minimum of two hours before final imaging and quantification.

140

#### 141 *ZIKV qPCR standard generation and viral qPCR quantification assay*

142 A region of the envelope protein of ZIKV strain PRVABC59 (833 bp) was generated to  
143 quantify viral load using specific primers (Forward: ATCTAGAAGAGCCGTGACGC; Reverse:  
144 CTGAAAAGTCAAGGCCTGTC) which were designed to flank the qPCR amplicon primers  
145 developed by Franz et al (26): Viral RNA was extracted from infected media using Trizol as  
146 follows. 100 uL of viral supernatant was added to 500 uL of Trizol. Chloroform (50 ul) was  
147 added and the sample incubated for 10 minutes at room temperature, followed by centrifugation  
148 at 4°C and 14,000g for 15 minutes. The aqueous phase (150 ul) was removed and incubated for  
149 one min at room temperature with 50 ul of isopropanol, then centrifuged at 4°C and a 14000g for  
150 15 minutes. Ethanol (400 ul, 80%) was added to each sample and incubated at room temperature  
151 for 20 min to evaporate, then resuspended in DEPC water. The isolated ZIKV total RNA was  
152 converted into cDNA using Applied Biosystem's High-Capacity cDNA kit (ThermoFisher,

153 Waltham, MA). The region of interest was subsequently amplified using PCR (GoTaq, Promega,  
154 Madison, WI) and the product purified using the QIAquick Gel extraction kit (Qiagen, Hilden,  
155 Germany). This product was ligated into the pGEM-T Easy Vector (Promega, Madison, WI), and  
156 then transfected into competent *E. coli* (JM109). After transfected colonies were selected, the  
157 plasmid was purified using the QIAprep Spin Miniprep kit (Qiagen, Hilden, Germany) and  
158 sequenced to verify the ZIKV amplicon. By modifying the forward primer above to include a T7  
159 flanking sequence, the validated plasmid was used as a template for PCR to generate cDNA. The  
160 new PCR product was purified and used as a template to generate pure ssRNA with the  
161 MEGAscript T7 RNA synthesis kit (Ambion, ThermoFisher, Waltham, MA) according to  
162 manufacturer protocols. The ssRNA standard was quantified using a Nanodrop 2000  
163 (ThermoFisher, Waltham MA), and the concentration of RNA was used to calculate the number  
164 of ssRNA copies (N) in the standard. The quantified ssRNA was diluted to generate a standard  
165 curve for absolute qPCR quantification with a concentration range of 2.13E+8 copies – 2.13E+4  
166 copies that was incorporated into each plate.

167         The following primers and Taq-man probes for the detection of ZIKV with qPCR  
168 methodology were used; Forward: CCGCTGCCCAACACAAG, Reverse:  
169 CCACTAACGTTCTTTTGCAGACAT, Probe: FAM-CTYAGACCAGCTGAAR-BBQ (16).  
170 ZIKV qPCR quantification was performed using the iTaq Universal Probes One-Step Kit (Bio-  
171 Rad, 172-5140) according to manufacturer protocol with a 10 ul reaction volume. RNA extracted  
172 from uninfected female *A. aegypti* was included in each plate as a negative control. Reactions  
173 were run on an Eppendorf RealPlex2 Mastercycler for 10 min at 50°C, 3 min at 95°C., 95°C for  
174 15, then 60°C for 30 sec. Samples were considered positive for ZIKV if amplification was



175 detected at or before a  $C_t$ , cycle threshold, value of 35. This number is highly conservative, as the  
176 CDC uses a  $C_t$  cut off value of 38. (27)

177

### 178 *Preparation of Infectious Bloodmeal and Oral infection of Mosquitoes*

179 PRVABC59 cell supernatant was diluted to the desired concentration and mixed with human  
180 whole blood provided by the American Red Cross (IBC protocol #2010-014), taking care to  
181 ensure that the virus solution added to the blood did not exceed 10% of the total volume to  
182 minimize dilution of the blood's nutritional value. The final titer of the blood meal for both trials  
183 was  $6.40 \times 10^7$  viral copies/mL as verified by qPCR and  $1.3 \times 10^3$  PFU/mL as determined by plaque  
184 assay, which corresponds with the clinically observed range of ZIKV in human blood titers. (28)  
185 Thirty 2-day old adult female mosquitoes were transferred to small containers and allowed to  
186 feed on the ZIKV supplemented blood from a membrane feeding system. After feeding for 1  
187 hour, mosquitoes were cold anaesthetized and female mosquitoes with visibly engorged  
188 abdomens were separated, while non-blood-fed mosquitoes were discarded. A total of 180 blood-  
189 fed female mosquitoes, 20 mosquitoes/cage, were separated into three temperature treatments of  
190 27°C, 30°C, and 33°C with 60 female mosquitoes (i.e. 3 cages) per treatment. At 0 days post  
191 infection, each cage was provided with an oviposition substrate and female mosquitoes were  
192 allowed to oviposit freely for 72 hours, representing the first gonotrophic cycle, after which the  
193 egg sheet was removed. Maternal mosquitoes were provided additional uninfected blood meals  
194 at 5 and 10 days post infection (dpi) to facilitate additional reproductive cycles. Oviposition  
195 substrates were provided after each blood meal, corresponding to the second and third  
196 gonotrophic cycles.

197

198 *Vertical Transmission to Progeny*

199 Potentially vertically-infected progeny of orally-infected female mosquitoes were reared  
200 according to the methods described above. After adult emergence, progeny mosquitoes were  
201 maintained in small cages at 20 mosquitoes/cage. At 3dpi, 7 dpi, and 14 dpi, ten adult female  
202 mosquitoes from each maternal temperature treatment and gonotrophic cycle cohort were cold  
203 anesthetized to collect saliva and abdomen samples. Legs and wings were removed, then each  
204 female's proboscis was inserted into a 0.2 mm capillary tube and allowed to salivate into mineral  
205 oil for five minutes, after which the saliva sample was aspirated into 200μL of DMEM mixed  
206 with 2% FBS, 1% pen/strep for processing. Saliva was tested for viral presence as a measure of  
207 potential infectiousness to humans and stored in -80°C for RNA extraction. Abdomen samples  
208 were collected in the same way as the I<sub>1</sub>s.

209 Leg/wing and abdomen samples were homogenized in 1.6 mL tubes with 500 μL of Trizol  
210 and Total RNA isolated with Trizol as described above. For saliva samples, 100 μL of  
211 saliva/DMEM solution was placed in 200μL of Trizol to inactivate any virus, then processed as  
212 above. Concentrations of the extracted RNA were verified using a Nanodrop 2000  
213 (ThermoFisher, Waltham MA) and stored in -80°C until a viral titer could be determined by  
214 qPCR as described above. To verify successful RNA extraction and cDNA synthesis, a qPCR  
215 reaction was run with *Ae. aegypti* actin primers and SYBR Green one step kit according to  
216 manufacturer protocol (ThermoFisher, Waltham MA).

217

218 *Statistical Analyses*

219 Evaluating the effects of the explanatory variables (i.e., maternal post-infection  
220 temperature, gonotrophic cycle, and progeny age) simultaneously using logistic regression was

221 not possible because the sample size did not allow this type of stratification of the data and  
222 resulted in unstable estimates of the regression coefficients. Accordingly, separate univariate  
223 logistic regression models were used to evaluate the effect of 1) maternal post-infection  
224 temperature, 2) gonotrophic cycle, 3) progeny age, and 4) experimental trial (n=2) on the odds of  
225 progeny infection. Experimental trial was treated as a categorical variable, while maternal  
226 temperature (27°C, 30°C, or 33°C), gonotrophic cycle (first, second, or third), and progeny age (3,  
227 7, or 14 days post-eclosion) were treated as numerical variables. Three outcomes were modeled:  
228 odds of progeny with detectable virus overall; odds of progeny with detectable virus in saliva;  
229 and odds of progeny with detectable virus in the abdomen. Exact binomial 95% confidence  
230 intervals were calculated for the percentage of ZIKV-infected mosquitoes for each level of the  
231 explanatory variables. Odds ratios reported for numerical predictors are unit odds ratios. For the  
232 categorical predictor experimental trial, the first trial was held as the reference category and the  
233 odds of the second trial relative to the first are reported. A Pearson chi-squared test with Yates  
234 continuity correction was used to evaluate whether viral presence in the abdomen was associated  
235 with virus presence in the saliva of individual mosquitoes. The observed proportion of progeny  
236 mosquitoes with both infected abdomens and saliva was compared to the expected proportion if  
237 the two types of infection are independent, which was the product of the observed proportions of  
238 progeny mosquitoes with infected abdomens only and infected saliva only.

239

## 240 **Results**

### 241 *Orally-infected Ae. aegypti females transmit ZIKV to their offspring*

242 To assess the rate of vertical transmission, we examined the offspring of orally-infected  
243 female *Ae. aegypti* for ZIKV presence in abdomens and saliva at multiple time points over a two

244 week period post-eclosion. Vertical transmission from orally-infected *Ae. aegypti* females to their  
 245 offspring occurred across all maternal temperature conditions, gonotrophic cycles, and adult  
 246 progeny ages tested. Overall, 6.5% (95% confidence interval = 3.9 - 9.9) of adult progeny had  
 247 detectable levels of ZIKV. Experimental trial was not a significant explanatory variable in any  
 248 analysis, indicating independence of progeny outcome from experimental trial. (Table 1)

249

250 **Table 1: Logistic Regression Analysis of ZIKV Vertical Transmission**

| Explanatory Variable        | Progeny Infection Outcome | X <sup>2</sup> | p-value     | Odds Ratio  |
|-----------------------------|---------------------------|----------------|-------------|-------------|
| <i>Experimental Trial</i>   | Total                     | 0.92           | 0.34        | 0.59        |
|                             | Abdomen                   | 1.41           | 0.24        | 0.39        |
|                             | Saliva                    | 0.11           | 0.74        | 0.79        |
| <i>Maternal Temperature</i> | Total                     | 1.59           | 0.21        | 0.87        |
|                             | Abdomen                   | 0              | 0.99        | 1           |
|                             | Saliva                    | 2.72           | 0.10        | 0.75        |
| <i>Gonotrophic Cycle</i>    | Total                     | <b>3.84</b>    | <b>0.05</b> | <b>1.95</b> |
|                             | Abdomen                   | 1.76           | 0.18        | 1.92        |
|                             | Saliva                    | 1.19           | 0.28        | 1.76        |
| <i>Progeny Age</i>          | Total                     | <b>3.91</b>    | <b>0.05</b> | <b>0.87</b> |
|                             | Abdomen                   | <b>4.07</b>    | <b>0.04</b> | <b>0.77</b> |
|                             | Saliva                    | 0              | 0.99        | 1           |

251

252 **Table 1: Logistic Regression Analysis of ZIKV Vertical Transmission**

253 *Each unique combination of explanatory variable and progeny infection outcome represents a*  
 254 *distinct univariate regression model. Odds ratios for numerical explanatory variables are*  
 255 *reported as unit odds ratios, odds ratios for categorical predictors are relative to the reference*  
 256 *category. Statistically significant models ( $p \leq 0.05$ ) are in bold.*

257

258 *ZIKV vertical transmission occurs at all maternal temperature conditions*

259 To assess the effect of maternal temperature on vertical transmission we maintained orally-  
260 infected maternal mosquitoes at 27°C, 30°C, and 33°C. ZIKV was present in adult progeny from  
261 every maternal temperature. Vertical transmission occurred to 8.3% (n = 109, 95% CI = 3.8 -  
262 15.1) of progeny from 27°C, 5.7% (n = 105, 95% CI = 2.1 - 12) from 30°C, and 3.8 % (n = 79,  
263 95% CI = 0.8 - 10.7) from 33°C. (Figure 1A) ZIKV was found in progeny abdomens at every  
264 temperature; 4% (n = 100, 95% CI = 1-1 – 9.9) of progeny abdomens from 27°C, 3% (n = 99,  
265 95% CI =0.6 - 8.6) from 30°C, and 3.8% (n = 79, 95% CI = 0.8 – 10.7) from 33°C. ZIKV was  
266 found in the saliva of 4.9% (n = 102, 95% CI = 1.6 – 11.1) of progeny from 27°C and 3.8% (n =  
267 104, 95% CI = 1.5 – 9.6) from 30°C, but not in any of the 77 progeny from the 33 °C treatment.  
268 (Figure 1B) There was no significant association between maternal temperature and the odds of  
269 ZIKV infection in the progeny mosquitos. (Table 1)

## 270 **Fig 1: Vertical Transmission by Maternal Temperature and Sample Type**

271 *(A) Percent of vertically infected progeny from each maternal temperature condition. (B)*  
272 *Percent of progeny with ZIKV present in abdomens, indicating vertical infection, and saliva,*  
273 *indicating potential infectiousness, from each maternal temperature condition.*

274

275 *ZIKV Vertical transmission occurs at every gonotrophic cycle*

276 To determine whether vertical transmission increased as the time between maternal  
277 infection and oviposition increased we assessed the rate of vertical transmission over consecutive  
278 gonotrophic cycles. Vertical transmission occurred in every gonotrophic cycle. ZIKV was  
279 detected in 4.0% (n = 174, 95% CI = 1.6 - 8.1) of progeny from the first gonotrophic cycle, 8.6%  
280 (n = 105, 95% CI = 4 - 15.6) from the second, and 14.3% (n = 14, 95% CI 1.8 - 42.8) from the

281 third. (Figure 2A) ZIKV was present in the abdomens of 1.7% (n = 174, 95% CI = 0.4 – 5.0)  
282 progeny from the first gonotrophic cycle and 7.8% (n = 90, 95% CI = 3.2 – 15.4) progeny from  
283 the second but was not detected in the abdomens of the fourteen progeny from the third  
284 gonotrophic cycle. ZIKV was detected in the saliva of 3.0% (n = 166, 95% CI = 1.0 – 6.9)  
285 progeny from the first cycle, 1.9% (n = 104, 95% CI = 0.2 – 6.8) of progeny from the second  
286 cycle, and 16.7% (n = 12, 95% CI = 2.1- 48.4) of progeny from the third cycle. (Figure 2B) The  
287 relatively small sample size of the third gonotrophic cycle was due to lower survivorship and  
288 fecundity of maternal mosquitoes after laying two previous batches of eggs. Gonotrophic cycle  
289 significantly affected the odds of overall ZIKV infection in progeny (p = 0.05, Odds ratio = 2),  
290 suggesting a greater number of developing ovarioles became infected with each subsequent  
291 cycle. However, there was no discernable influence of gonotrophic cycle on the odds of viral  
292 presence in abdomen tissue or saliva samples individually. (Table 1)

293

## 294 **Fig 2: Vertical Transmission by Gonotrophic Cycle and Sample Type**

295 *(A) Percent of vertically infected progeny from each gonotrophic cycle. (B) Percent of progeny*  
296 *with ZIKV present in abdomens, indicating vertical infection, and saliva, indicating potential*  
297 *infectiousness, from each gonotrophic cycle.*

298 *ZIKV infection persists for at least two weeks in infected progeny*

299 Persistence of ZIKV in vertically infected progeny is essential for viral maintenance  
300 within mosquito populations and would result in greater opportunities for the virus to be passed  
301 to vertebrate hosts during bloodfeeding. We found ZIKV in progeny up to two weeks after adult  
302 eclosion. ZIKV was detected in 11.7 % (n = 103, 95% CI = 6.2 - 19.5) of three day old progeny,

303 2.8 % (n = 108, 95% CI = 0.6 - 7.9) of seven day old progeny, and 3.7 % (n = 82, 95% CI = 0.8 -  
304 10.3) of fourteen day old progeny. (Figure 3A) ZIKV was detected in the abdomens of 8.2% (n =  
305 98, 95% CI = 3.6 – 15.5) of three day old progeny, 1.0% (n = 98, 95% CI = 0 – 5.6) of seven day  
306 old progeny, and 1.2% (n = 82, 95% CI = 0 – 6.6) of fourteen day old progeny. ZIKV was  
307 detected in the saliva of 4.4% (n = 91, 95% CI = 1.2 – 10.8) of three day old progeny, 1.9% (n =  
308 105, 95% CI = 0.2 – 6.7) of seven day old progeny, and 3.4% (n = 87, 95% CI = 0.8 – 9.7) of  
309 fourteen day old progeny. (Figure 3B) Progeny age was significantly associated with reduced  
310 odds of virus presence in progeny mosquitoes overall (p = 0.05, Odds ratio = 0.87) and in  
311 progeny abdomens (p = 0.04, Odds ratio = 0.77), but not with viral presence in saliva. (Table 1)

312

313 ***Fig 3: Vertical Transmission by Progeny Age and Sample Type***

314 *(A) Percent of vertically infected progeny by age (days) at dissection. (B) Percent of progeny*  
315 *with ZIKV present in abdomens, indicating vertical infection, and saliva, indicating potential*  
316 *infectiousness, by age (days) at dissection.*

317 *Vertically infected progeny have ZIKV in their saliva*

318 For transmission to the vertebrate host to occur, virus must be present in the mosquito's  
319 saliva. ZIKV positive saliva was detected in 3.4 % (1.6 - 6.2) of progeny, or half of all vertically-  
320 infected progeny. Virus was found in saliva of adult progeny hatched from every gonotrophic  
321 cycle and at every progeny age tested. ZIKV positive saliva was detected in progeny from all  
322 maternal temperature conditions except 33°C, though the sample size was smaller for this  
323 temperature (n = 77). None of the explanatory variables were significantly associated with ZIKV  
324 presence in saliva. (Table 1) Additionally, though virus was detected in just the saliva or just the

325 abdomens of 3.07% of progeny mosquitoes, viral presence in progeny abdomens was not  
326 significantly associated with viral presence in saliva ( $X^2 = 0.001$ ,  $p = 0.97$ ), and only occurred in  
327 one progeny mosquito.

328

## 329 **Discussion**

330 Understanding the capacity of ZIKV to establish itself in vector mosquito populations, persist  
331 through periods of low transmission, and initiate future outbreaks is vitally important to public  
332 health. We found vertical transmission occurred from orally infected female *Ae. aegypti* to 6.5%  
333 (95% CI = 3.9 - 9.9) of adult female progeny. This is consistent with vertical transmission rates  
334 of other *Aedes*-borne flaviviruses, including DENV-3 (3%), chikungunya (20.2%), and yellow  
335 fever (8.2%) (29, 11, 12) and is substantiated by evidence from the field. ZIKV positive males  
336 have been identified in Mexico and Brazil, confirming its occurrence. (4,33) Whether this rate of  
337 vertical transmission is sufficient to contribute to future outbreaks has been debated. The  
338 estimated minimum rate of vertical transmission required to influence human cases of a similar  
339 arbovirus, dengue, ranges from 4% to 20-30%. (30, 31) Some studies have contested that human  
340 movement and asymptomatic cases contribute more significantly to human dengue prevalence  
341 than vertical transmission. (31, 32) However, peaks in the vertical transmission of dengue have  
342 been shown to precede disease outbreaks during periods of high mosquito density. (34) At a  
343 minimum, vertical transmission should be considered as one of ZIKV's multiple modes of  
344 transmission and incorporated into prevention strategies, surveillance plans, and models of  
345 transmission risk.

346 Vertical transmission of ZIKV throughout an infected mosquito's reproductive lifetime could  
347 facilitate pathogen establishment. Considering all progeny tested, orally-infected *Ae. aegypti*



348 females were twice as likely to vertically transmit ZIKV to their progeny with each consecutive  
349 gonotrophic cycle ( $p = 0.05$ , Odds ratio = 2), suggesting a greater number of ovarioles were  
350 invaded by virus as the maternal mosquito aged. However, analyses considering abdomen and  
351 salivary infection separately did not find a significant association between gonotrophic cycle and  
352 progeny infection (Table 1), which could have arisen because of reduced statistical power due to  
353 the low number of progeny infected overall. Mosquito survivorship in the field is significantly  
354 lower than under laboratory conditions, and even in the lab not many maternal mosquitoes lived  
355 to complete a third gonotrophic cycle, as reflected by our small sample size. (16) Accordingly,  
356 the shorter reproductive lifetime of mosquitoes in the field may attenuate the impact of higher  
357 transmission rates during later gonotrophic cycles.

358 Vertical transmission occurred across a wide range of maternal temperature conditions,  
359 suggesting that it could be a robust mechanism for ZIKV maintenance in mosquitoes. During the  
360 2015 pandemic, ZIKV spread to a variety of climates and this window of temperatures suitable  
361 for vertical transmission could be one of opportunity for ZIKV establishment. (1) Geographic  
362 regions with a competent vector population and average temperatures that overlap 27-33°C,  
363 including much of the southern United States, are at risk of ZIKV vertical transmission. (35)  
364 Interestingly, ZIKV vertical transmission was not significantly associated with higher  
365 temperatures, unlike horizontal transmission of a similar arbovirus; dengue. (22)

366 Persistence of ZIKV vertical infection up to two weeks after adult progeny eclosion extends  
367 the possibility of pathogen persistence in previous outbreak areas and transmission to human  
368 hosts. However, lifelong presence of ZIKV in the saliva of progeny mosquito, as opposed to  
369 saliva infection of older mosquitoes with horizontal transmission, may alter aspects of the virus-  
370 vector relationship. In horizontally infected mosquitoes, virus must be acquired from an infected

371 host, which may not occur during the first bloodfeeding. The virus must then disseminate  
372 through the body, including the abdomen, to reach the salivary glands. (15) However, for  
373 vertical transmission, ZIKV presence in the abdomens of infected progeny appeared independent  
374 of presence of ZIKV in the saliva ( $p = 0.97$ ). The relationship between mosquito age and  
375 likelihood of viral infection also differs between horizontal and vertical transmission. Vertically  
376 infected progeny were less likely to test positive for ZIKV as they aged, with a 13% reduction in  
377 the odds of overall infection ( $p = 0.05$ , Odds ratio = 0.87) and a 23% reduction in the odds of  
378 abdomen infection ( $p = 0.04$ , Odds ratio = 0.77). This relationship is reversed in horizontally  
379 infected mosquitoes, as dengue transmission increases with mosquito lifespan. (22)

380 The presence of virus in the saliva of vertically infected progeny provides ZIKV with a  
381 potential bridge between mosquitoes and humans. This bridge was present at all progeny ages  
382 tested, with ZIKV detected in the saliva as early as three days and as late as 14 days after adult  
383 emergence. Whether there is a difference in vector competence between vertically and  
384 horizontally infected mosquitoes should be the subject of further research. Not only do  
385 vertically-infected progeny have the capacity to start an outbreak, they likely have greater  
386 opportunity to do so than horizontally-infected mosquitoes. Vertically infected mosquitoes  
387 bypass two essential requirements necessary for horizontal transmission, obtaining the initial  
388 infectious blood meal and surviving the extrinsic incubation period (EIP). The maternal  
389 mosquitos in our study had a minimum EIP of 3 days (*R. Zinna, unpub. data*), and other studies  
390 found the average ZIKV EIP to range from 4 to 10 days. (14,15) Without the need to find an  
391 initial infectious bloodmeal and survive the multi-day waiting period imposed by the EIP,  
392 vertically infected adult progeny are capable of transmitting the virus to humans at a younger age  
393 and for a greater percentage of their adult lives.

394 *Conclusion*

395 We found vertical transmission from orally infected females occurs as early as the first  
396 reproductive cycle following the initial infectious bloodmeal, at a range of maternal  
397 temperatures, and that ZIKV infection persists in the progeny for at least two weeks after adult  
398 eclosion. ZIKV was detected in the saliva of vertically infected progeny, and the resulting  
399 elimination of the extrinsic incubation period means these mosquitoes have a longer interval than  
400 horizontally infected mosquitos to bite and infect a human. Consequently, ZIKV has the  
401 potential to be maintained in mosquito populations even in the absence of transmission cycles to  
402 the vertebrate host and thus can cause future outbreaks without the need for viral reintroduction.  
403 These findings reinforce the need to conduct surveillance and viral testing in mosquito  
404 populations where ZIKV transmission has occurred in the past.

405

406 **Acknowledgements**

407 The authors would like to extend a heartfelt thank you to Teresa Joy, for her assistance in the lab,  
408 Michael Pham, for his cell-culture expertise, and Jenet Soto-Shoumaker, for maintaining the  
409 large research colonies that made this work possible. We would also like to thank Kathryn  
410 Fitzpatrick for her troubleshooting advice.

411

412 **References**

413 1. Zika Travel Information. Centers for Disease Control and Prevention. Centers for  
414 Disease Control and Prevention. 2016. Available from:  
415 <https://wwwnc.cdc.gov/travel/page/zika-information>

- 416 2. Dasgupta S, Reagan-Steiner S, Goodenough D, Russell K, Tanner M, Lewis L, et al.  
417 Patterns in Zika Virus Testing and Infection, by Report of Symptoms and Pregnancy  
418 Status — United States, January 3–March 5, 2016. *MMWR Morb Mortal Wkly Rep*.  
419 2016 April 22;65:395–399. doi: <http://dx.doi.org/10.15585/mmwr.mm6515e1>.
- 420 3. Soares C, Brasil P, Carrera R, Sequeira P, de Filippis AB, Borges V, et al. Fatal  
421 encephalitis associated with Zika virus infection in an adult. *J Clin Virol*. 2016 Oct.  
422 83:63-5. doi: 10.1016/j.jcv.2016.08.297.
- 423 4. Elizondo-Quiroga D, Medina-Sánchez A, Sánchez-González J, Eckert K, Villalobos-  
424 Sánchez E, Rigoberto Navarro-Zúñiga A, et al. Zika Virus in Salivary Glands of Five  
425 Different Species of Wild-Caught Mosquitoes from Mexico. *Scientific Reports*. 2018.  
426 8(1):809. doi: 10.1038/s41598-017-18682-3
- 427 5. Alaniz, A. J., Bacigalupo, A. & Cattan, P. E. Spatial quantification of the world  
428 population potentially exposed to Zika virus. *Int J Epidemiol* 2017. 46;3: 966–975. doi:  
429 10.1093/ije/dyw366
- 430 6. Weaver S, Reisen W. Present and future arboviral threats. *Antiviral Research*. 2010  
431 Feb. 85;10:328-345. doi: 10.1016/j.antiviral.2009.10.008
- 432 7. Lequime S, Paul RE, Lambrechts L. Determinants of Arbovirus Vertical Transmission  
433 in Mosquitoes. *PLOS Pathogens*. 2016 May 12;12(5):e1005548.
- 434 8. Nasci R, Savage H, White D, Miller J, Cropp B, Godsey M et al. West Nile virus in  
435 overwintering *Culex* mosquitos, New York City, 2000. *Emerg Infect Dis*. 2001. 7;4: 742-  
436 744. doi: [10.3201/eid0704.010426](https://doi.org/10.3201/eid0704.010426)

- 437 9. Dhileepan K, Azuolas J, Gibson C. Evidence of vertical transmission of Ross River  
438 and Sindbis viruses (Togaviridae: Alphavirus) by mosquitoes (Diptera: Culicidae) in  
439 southeastern Australia. *J Med Entomol.* 1996 Jan. 33;1:180-2. PMID: 8906927
- 440 10. Kow C, Koon L, and Yin P. Detection of Dengue Viruses in Field Caught Male *Aedes*  
441 *aegypti* and *Aedes albopictus* (Diptera: Culicidae) in Singapore by Type-Specific PCR. *J*  
442 *Med Entomol.* 2001. 38;4:475-479. doi:10.1603/0022-2585-38.4.475
- 443 11. Agarwal, A. Dash K, Singh, A, Sharma S, Gopalan N, Rao P, et al. Evidence of  
444 Experimental Vertical Transmission of Emerging Novel ECSA Genotype of  
445 Chikungunya Virus in *Aedes aegypti*. *PLoS Neglected Tropical Diseases.* 2014 Jul.  
446 8;7:e2990. doi:10.1371/journal.pntd.0002990
- 447 12. Fontenille D, Diallo M, Mondo M, Ndiaye M, and Thonnon J. First evidence of  
448 natural vertical transmission of yellow fever virus in *Aedes aegypti*, its epidemic vector.  
449 *Trans R Soc Trop Med Hyg.* 1997 Sep 1. 91;5:533-535. doi:10.1016/S0035-  
450 9203(97)90013-4
- 451 13. Baqar S, Hayes C, Murphy J, and Watts D. Vertical Transmission of West Nile Virus  
452 by *Culex* and *Aedes* Species Mosquitoes. *Am J Trop Med Hyg.* 1993 May 1. 48;6:757-  
453 762. doi: 10.4269/ajtmh.1993.48.757
- 454 14. Wong PSJ, Li M, Zhi I, Chong CS, Ng LC, Tan CH. *Aedes* (*Stegomyia*) *albopictus*  
455 (Skuse): A Potential Vector of Zika Virus in Singapore. *PLoS Negl Trop Dis.* 2013 Aug  
456 1. 7;8:e2348. doi: 10.1371/journal.pntd.0002348

- 457 15. Roundy C, Azar S, Rossi S, Huang J, Leal G, et al. Variation in *Aedes aegypti*  
458 Mosquito Competence for Zika Virus Transmission. *Emerg Infec Dis*. 2017 April.  
459 23;4:625-632. doi: 10.3201/eid2304.161484
- 460 16. Brady O, Johansson M, Guerra C, Bhatt S, Golding N, et al. Modelling adult *Aedes*  
461 *aegypti* and *Aedes albopictus* survival at different temperatures in laboratory and field  
462 settings. *Parasites and Vectors*. 2013 Dec 12. 6:351. doi:10.1186/1756-3305-6-351
- 463 17. Thangimani S, Huang J, Hart C, Guzman H, and Tesh R. Vertical Transmission of  
464 Zika Virus in *Aedes aegypti* Mosquitoes. *Am J Trop Med Hyg*. 2016 Nov 2. 95;5:1169-  
465 1173. doi:10.4269/ajtmh.16-0448
- 466 18. Ciota A, Bialosuknia S, Ehrbar D, Kramer L. Vertical Transmission of Zika Virus by  
467 *Aedes aegypti* and *Ae. albopictus* Mosquitoes. *Emerg Infec Dis*. 2017 May. 23;5:880-  
468 882. doi: 10.3201/eid2305.162041
- 469 19. Tran A, L'Amber G, Lacour G, Benoit R, Demarchi M. A Rainfall- and  
470 Temperature-Driven Abundance Model for *Aedes albopictus* Populations. *International*  
471 *Journal of Environmental Research and Public Health*. 2013 April 26. 10;5:1698-1719.  
472 doi: 10.3390/ijerph10051698
- 473 20. Focks D, Haile D, Daniels E, Mount G. Dynamic life table model for *Aedes aegypti*  
474 (Diptera: Culicidae): analysis of the literature and model development. *J Med Entomol*.  
475 1993 Nov. 30;6:1003-1017. PMID: 8271242
- 476 21. Costa E, Santos E, Correia J, Albuquerque C. Impact of small variations in  
477 temperature and humidity on the reproductive activity and survival of *Aedes aegypti*

- 478 (Diptera, Culicidae). *Revista Brasileira de Entomologia*. 2010. 54;3:488-493. doi:  
479 10.1590/S0085-56262010000300021
- 480 22. Barbazan P, Guiserix M, Boonyuan W, Tuntaprasart W, Pontier D. Modelling the  
481 effect of temperature on transmission of dengue. *Med Vet Entomol*. 2010 Mar. 24;1:66-  
482 73. doi: 10.1111/j.1365-2915.2009.00848
- 483 23. Ndoen E, Wild C, Dale P, Sipe N, Dale M. Mosquito Longevity, Vector Capacity,  
484 and Malaria Incidence in West Timor and Central Java, Indonesia. *International*  
485 *Scholarly Research Notices*. 2012. 2012:1-5. doi: 10.1016/j.trstmh.2008.07.025
- 486 24. Black WC, Bennett KE, Gorrochótegui-Escalante N, Barillas-Mury C V., Fernández-  
487 Salas I, de Lourdes Muñoz M, et al. Flavivirus Susceptibility in *Aedes aegypti*. *Arch Med*  
488 *Res. Elsevier*; 2002 Jul 1. 33;4:379–88. doi: 10.1016/S0188-4409(02)00373-925.
- 489 25. Agbulos D, Barelli L, Giordano B, Hunter F. Zika virus: Quantification, propagation,  
490 detection, and storage. *Curr. Protoc. Microbiol*. 2016 Nov. 43:15D.4.1-15D.4.16. doi:  
491 10.1002/cpmc.19
- 492 26. Franz AWE, Kantor AM, Passarelli AL, Clem RJ. Tissue Barriers to Arbovirus  
493 Infection in Mosquitoes. *Viruses*. Multidisciplinary Digital Publishing Institute  
494 (MDPI).2015. 7;7: 3741-3767. doi:10.3390/v7072795
- 495
- 496
- 497 27. Center for Disease Control and Prevention. Triplex Real Time PCR Assay  
498 Instructions for Use. Center for Disease Control and Prevention. 2017 April 6. Available

- 499 from: [https://www.cdc.gov/zika/pdfs/trioplex-real-time-rt-pcr-assay-instructions-for-](https://www.cdc.gov/zika/pdfs/trioplex-real-time-rt-pcr-assay-instructions-for-use.pdf)  
500 [use.pdf](https://www.cdc.gov/zika/pdfs/trioplex-real-time-rt-pcr-assay-instructions-for-use.pdf)
- 501 28. Gallian P, Cabie A, Richard P, Paturel L, Charel R, et al. Zika virus in asymptomatic  
502 blood donors in Martinique. *Blood* [Internet]. 2017 Jan 12. [cited 2017 Oct  
503 4];129;(2):263-266. doiAvailable at: <http://www.bloodjournal.org/content/129/2/263>  
504 DOI: 10.1182/blood-2016-09-737981
- 505 29. Joshi V, Mourya D, Sharma R. Persistence of dengue-3 virus through transovarial  
506 transmission passage in successive generations of *Aedes aegypti* mosquitoes. *Am J Trop*  
507 *Med Hyg.* 2002 Aug. 67;2:158-161. doi: 10.4269/ajtmh.2002.67.158
- 508 30. DeFoliart G, Grimstad P, Watts D. Advances in Mosquito-Borne Arbovirus/Vector  
509 Research. *Ann Rev Entom.* 1987. 32;1:479-505. doi:  
510 10.1146/annurev.en.32.010187.002403
- 511 31. Adams B, Boots M. How important is vertical transmission in mosquitoes for the  
512 persistence of dengue? Insights from a mathematical model. *Epidemics.* 2010 Mar 1.  
513 2;1:1-10. doi: 10.1016/j.epidem.2010.01.001
- 514 32. Grunnill M, Boots M. How Important is Vertical Transmission of Dengue Viruses by  
515 Mosquitoes (Diptera: Culicidae)? *J Med Entomol.* 2016 Jan 1;53(1):1–19. doi:  
516 10.1093/jme/tjv168
- 517 33. Ferreira-de-Brito A, Ribeiro I, Miranda R, Fernandes R, Campos S et al. First  
518 detection of natural infection of *Aedes aegypti* with Zika virus in Brazil and throughout  
519 South America. *Memórias do Instituto Oswaldo Cruz.* 2016 Oct. 111;10:655-658. doi:  
520 10.1590/0074-02760160332



521 34. Lee H, Rohani A. Transovarial Transmission of Dengue in *Aedes aegypti* and *Aedes*  
522 *albopictus* in Relation to a Dengue Outbreak in an Urban Area. *Dengue Bulletin*. 2005.

523 29:106-111. Available from:

524 <http://apps.who.int/iris/bitstream/10665/164121/1/dbv29p106.pdf>

525 35. Monaghan AJ, Morin CW, Steinhoff DF, Wilhelmi O, Hayden M, Quattrochi DA, et

526 al. On the Seasonal Occurrence and Abundance of the Zika Virus Vector Mosquito *Aedes*

527 *Aegypti* in the Contiguous United States. *PLoS Curr* [Internet]. 2016 Mar 16 [cited 2018

528 Feb 14]; Available from: [http://currents.plos.org/outbreaks/article/on-the-seasonal-](http://currents.plos.org/outbreaks/article/on-the-seasonal-occurrence-and-abundance-of-the-zika-virus-vector-mosquito-aedes-aegypti-in-the-contiguous-united-states/)

529 [occurrence-and-abundance-of-the-zika-virus-vector-mosquito-aedes-aegypti-in-the-](http://currents.plos.org/outbreaks/article/on-the-seasonal-occurrence-and-abundance-of-the-zika-virus-vector-mosquito-aedes-aegypti-in-the-contiguous-united-states/)

530 [contiguous-united-states/](http://currents.plos.org/outbreaks/article/on-the-seasonal-occurrence-and-abundance-of-the-zika-virus-vector-mosquito-aedes-aegypti-in-the-contiguous-united-states/)

531

**A. Zika Transmission by Temperature**

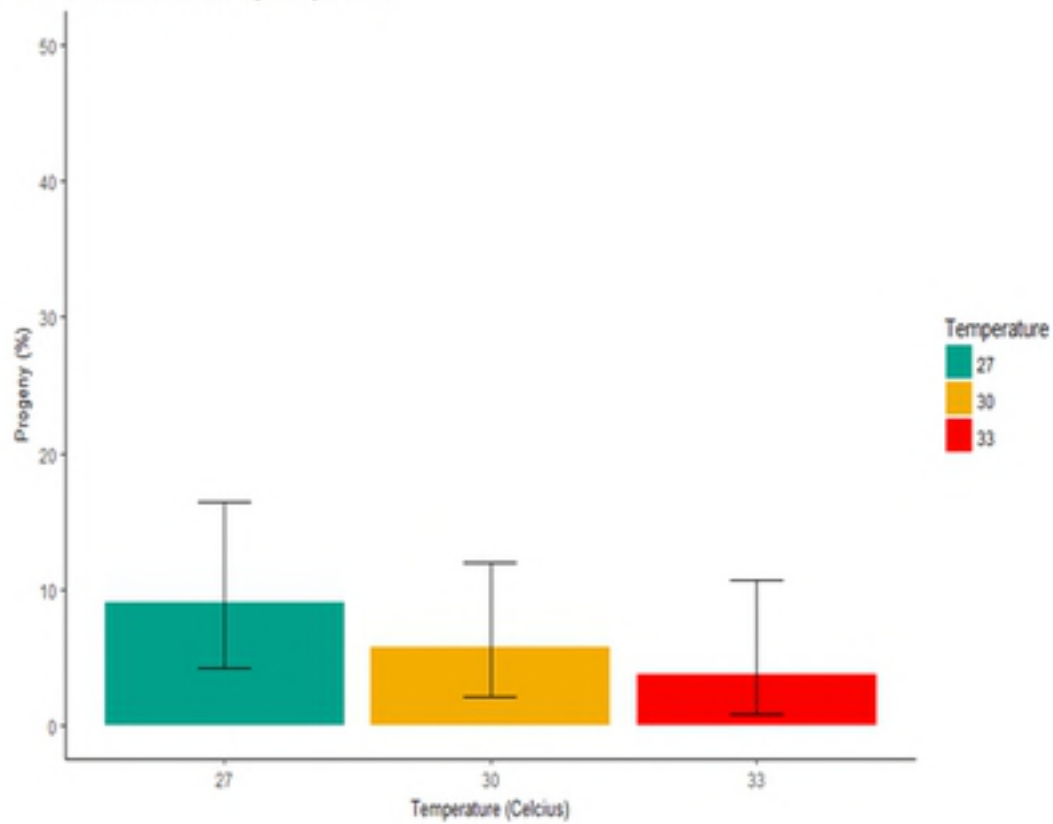

**B. Zika Transmission by Temperature, Sample**

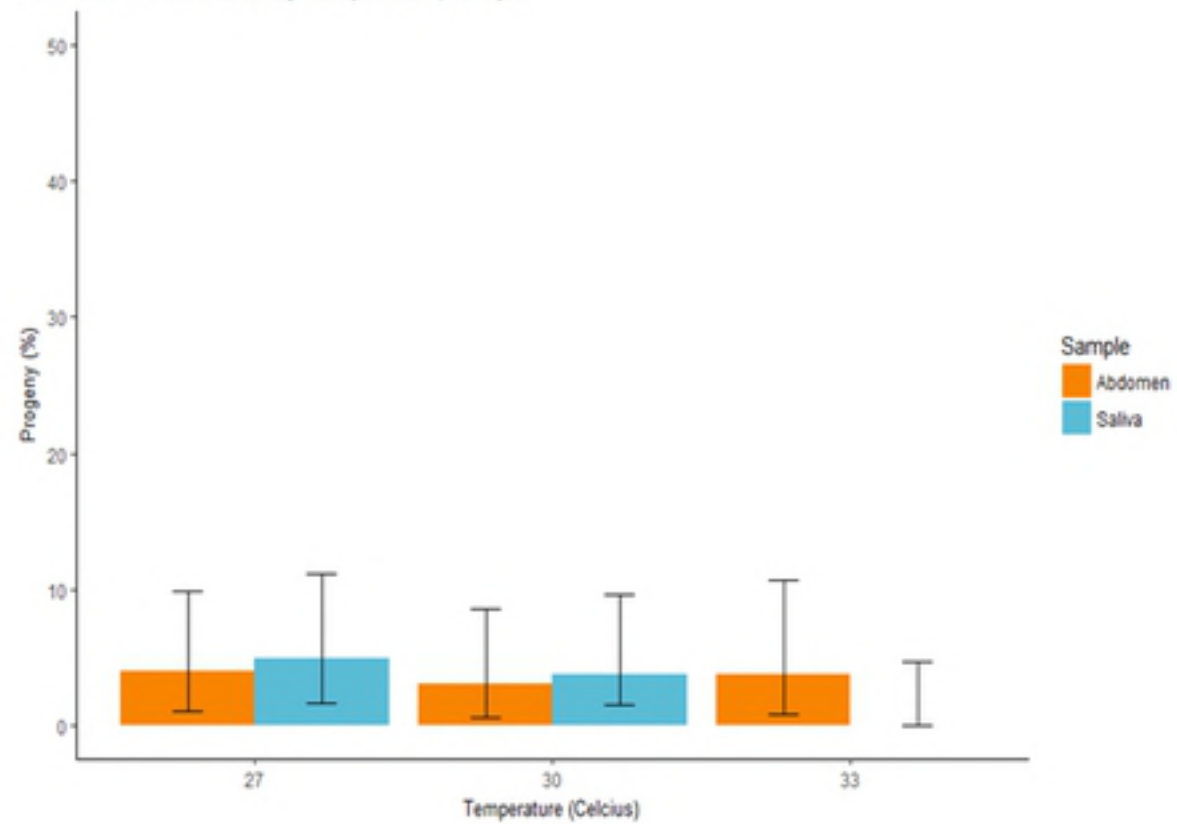

**A. Zika Transmission by Gonotrophic Cycle**

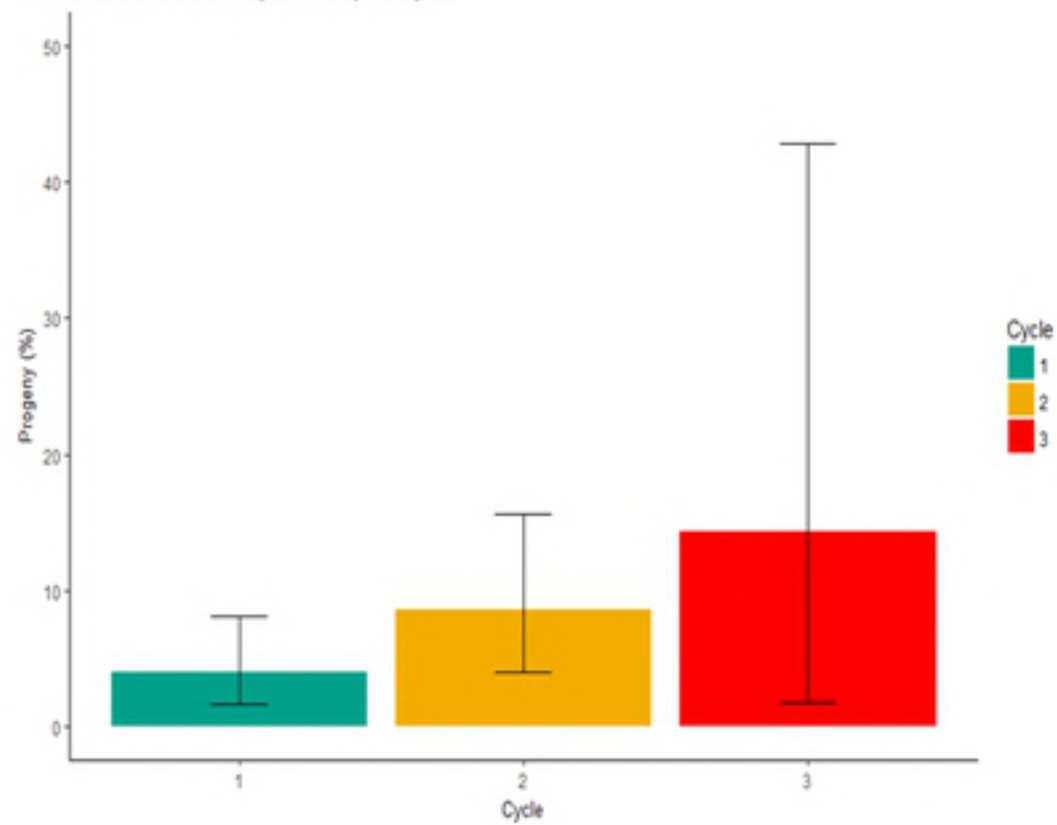

**B. Zika Transmission by Gonotrophic Cycle, Sample**

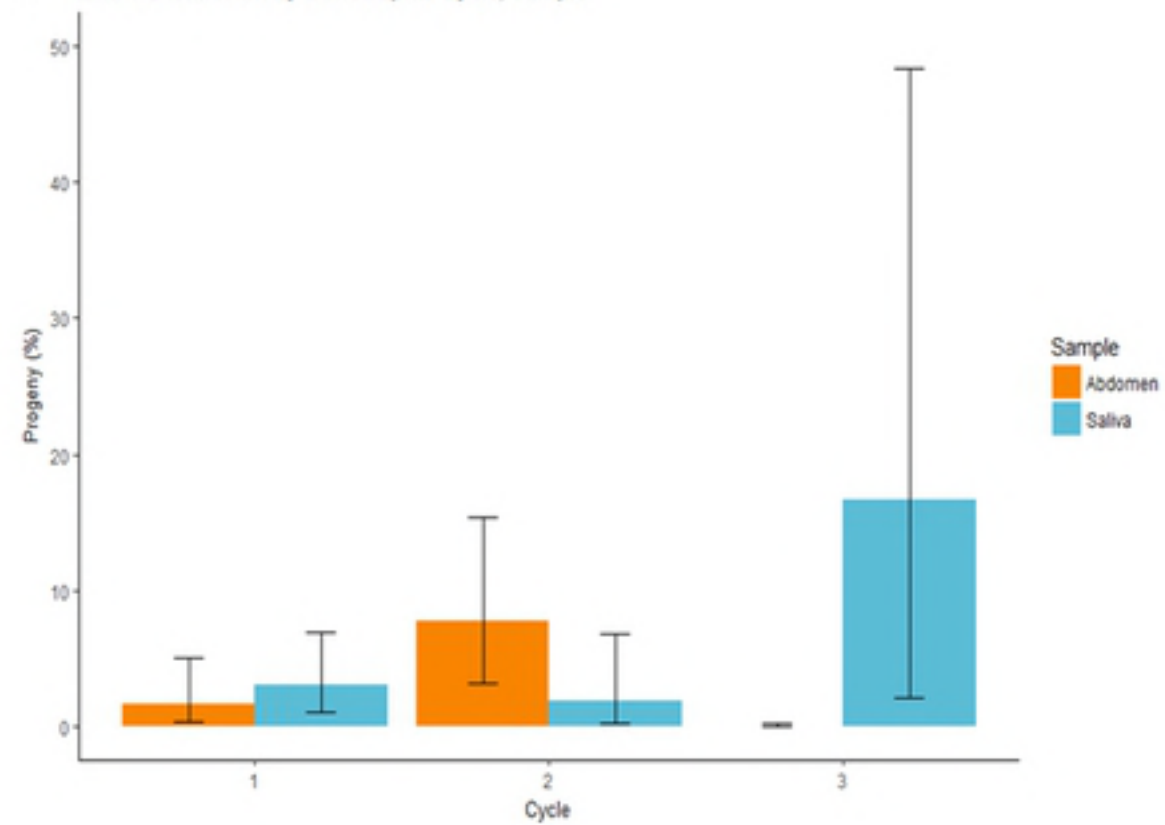

**A. Zika Transmission by Progeny Age (Days)**

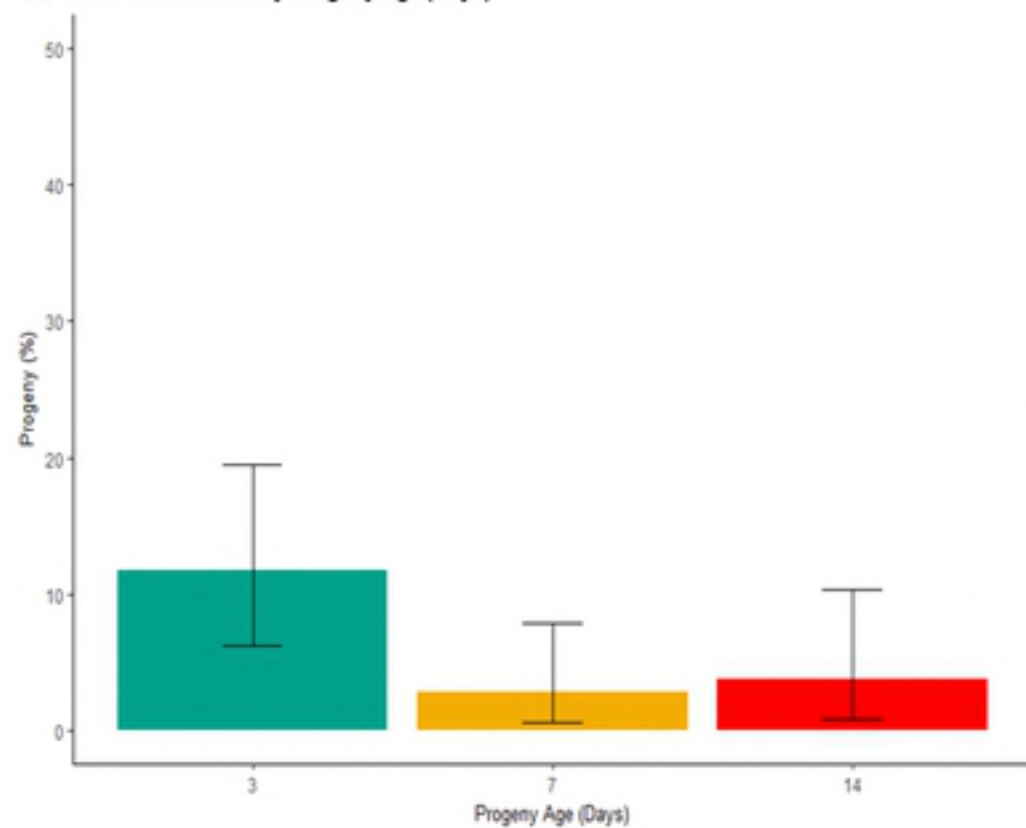

**B. Zika Transmission by Progeny Age, Sample**

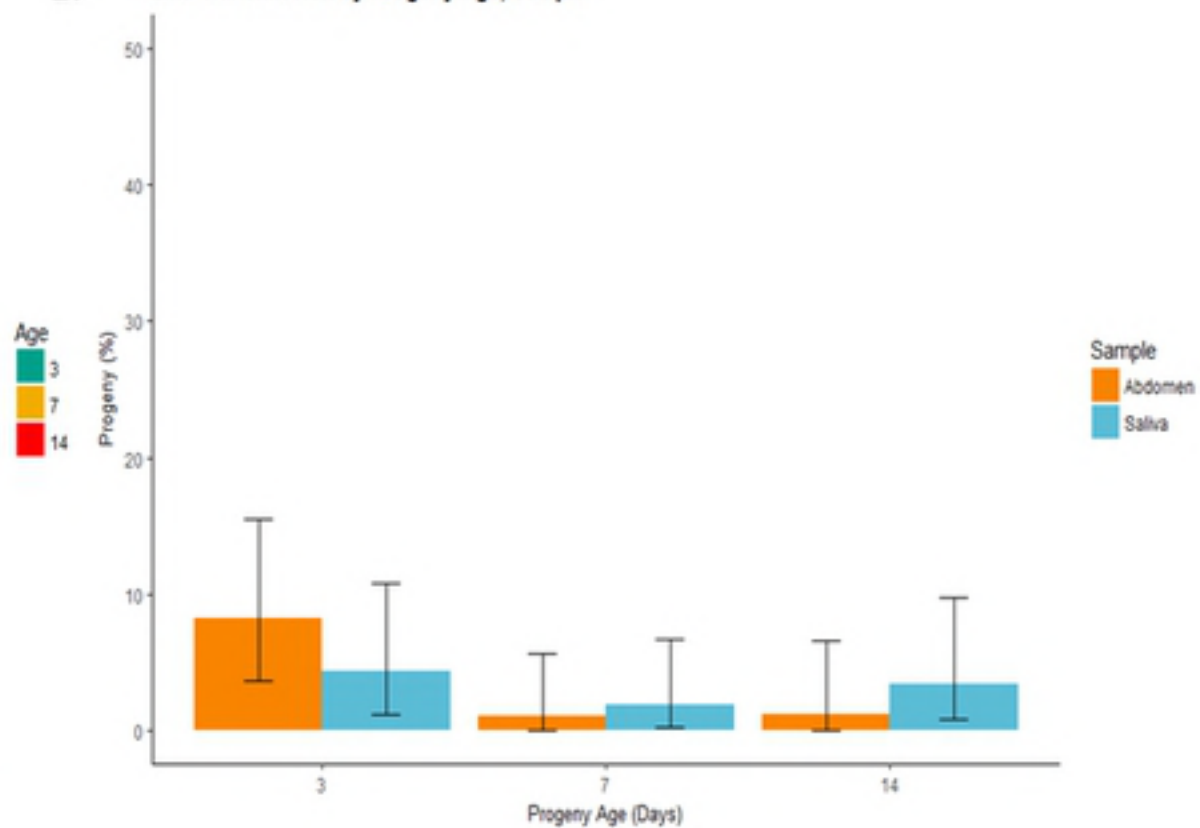

Source: https://biorxiv.org/content/biorxiv/early/2018/07/24/375964.full-text.pdf
